# Supplementary material for: Resilience to temperature and pH changes in a future climate change scenario in six strains of the polar diatom Fragilariopsis cylindrus
Source: Copernicus journal article supplement (doi:10.5194/bg-12-4235-2015), 2015-07-20
Supplement: Supplementary file 1 [file bg-12-4235-2015-supplement.pdf]

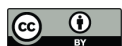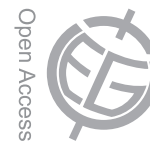

*Supplement of*

**Resilience to temperature and pH changes in a future climate  
change scenario in six strains of the polar diatom  
*Fragilariopsis cylindrus***

**M. Pančić et al.**

*Correspondence to:* M. Pančić (marina.pancic@hotmail.com)

The copyright of individual parts of the supplement might differ from the CC-BY 3.0 licence.

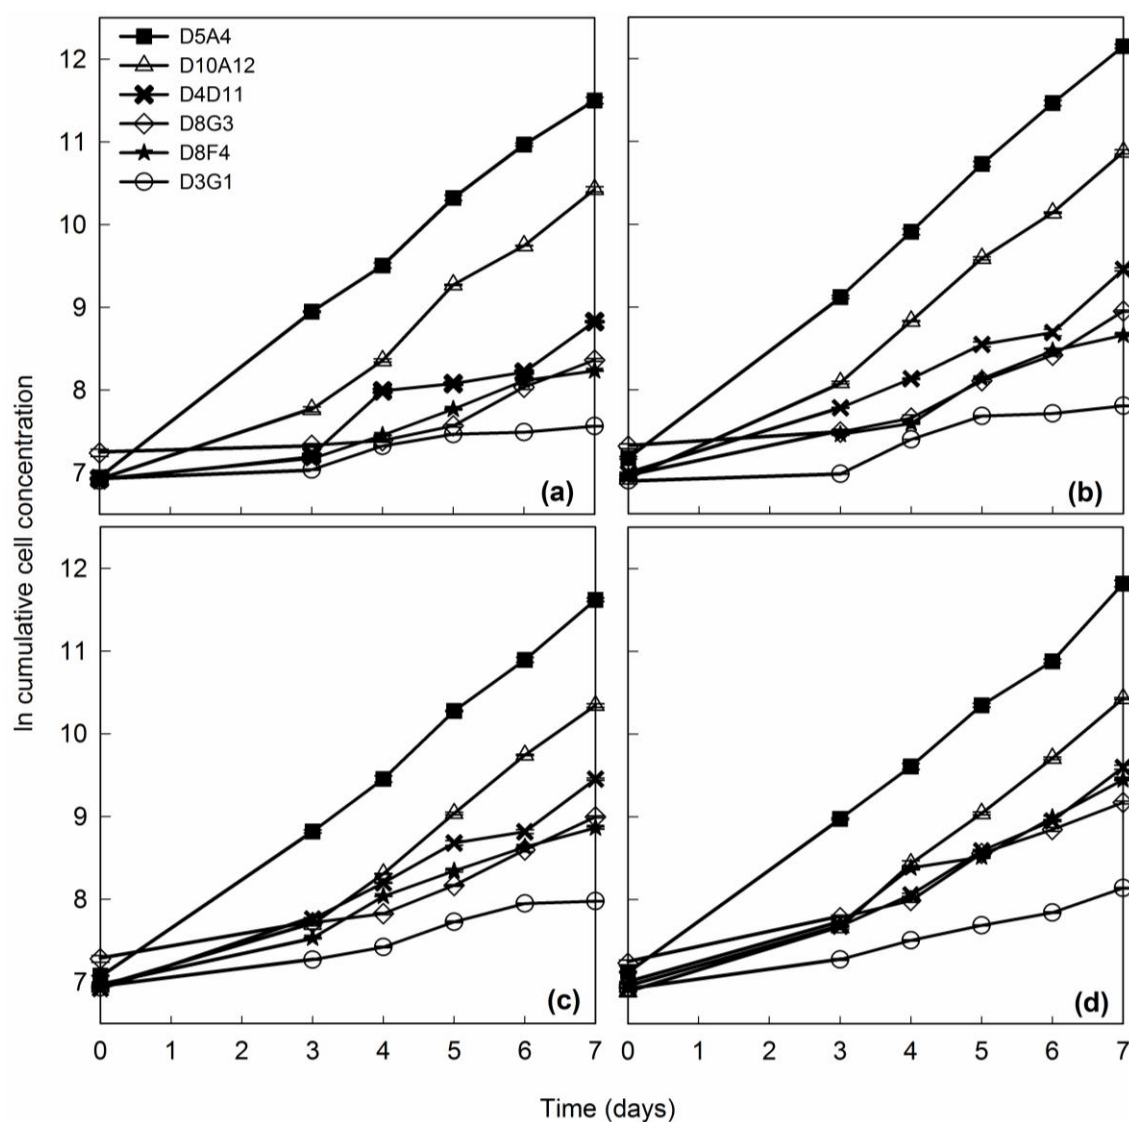

Figure S1. An example of cumulative logarithmic cell concentration versus time for strains D5A4, D10A12, D4D1, D8G3, D8F4 and D3G1, cultivated at 5 °C and a pH treatment of (a) 7.1, (b) 7.4, (c) 7.7, and (d) 8.0. Day 0 to day 3 were set as part of the acclimation period and not included in the results. Error bars represent  $\pm$  SD.

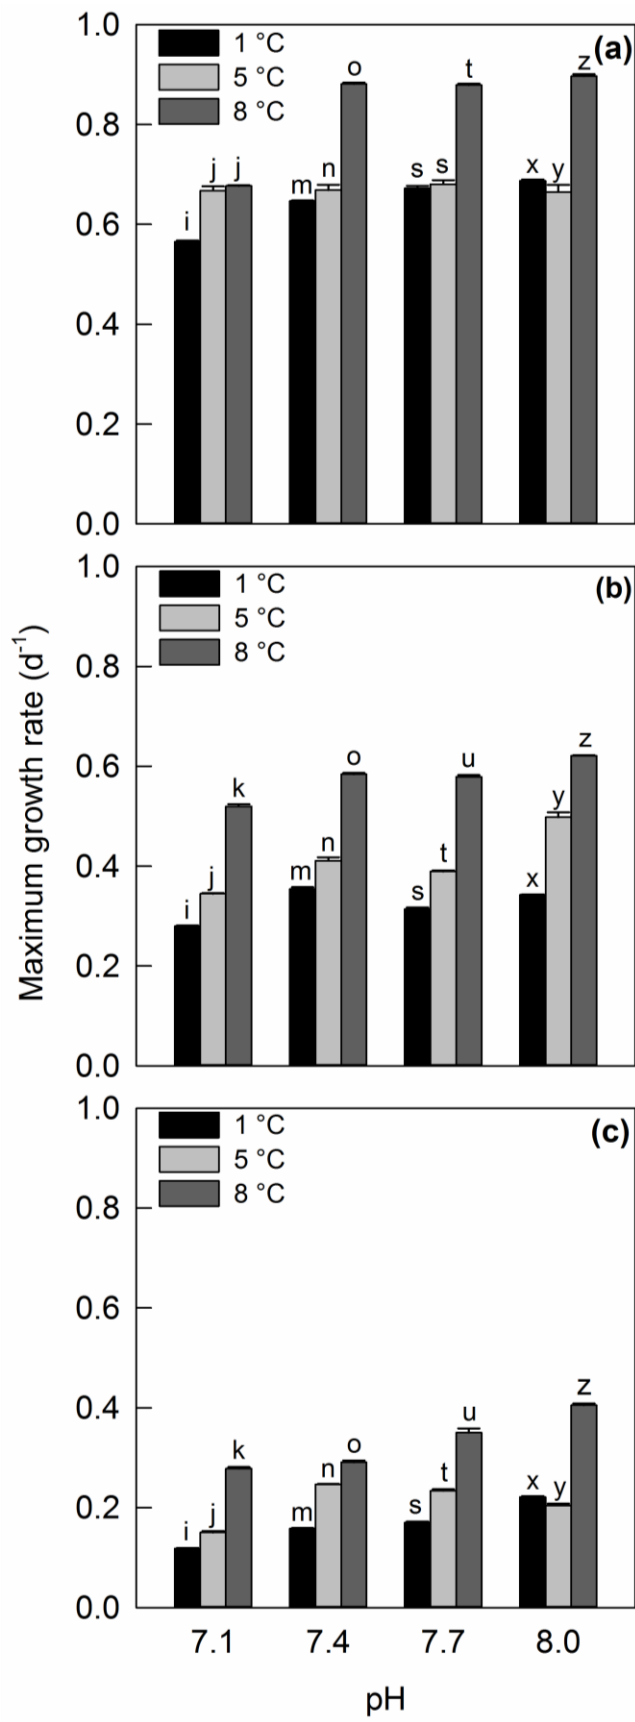

Figure S2. The mean maximum growth rates ( $d^{-1}$ ) for strain **(a)** D10A12, **(b)** D4D11, and **(c)** D3G1 cultured at temperatures of 1 °C, 5 °C and 8 °C, and four pH treatments. Error bars represent  $\pm$  SD. Different letters above the bars represent significant differences in growth rates within the specific strain (three-way ANOVA,  $P \leq 0.05$ ).

Table S1. The mean maximum growth rates  $\pm$  SD ( $\text{d}^{-1}$ ) of D5A4, D10A12, D4D11, D8F4, D8G3 and D3G1 strains cultivated at 5 °C, and all four pH treatments.

| pH<br>treatments | D5A4            | D10A12          | D4D11           | D8G3            | D8F4            | D3G1            |
|------------------|-----------------|-----------------|-----------------|-----------------|-----------------|-----------------|
| 7.1              | $0.66 \pm 0.02$ | $0.67 \pm 0.01$ | $0.34 \pm 0.00$ | $0.34 \pm 0.01$ | $0.31 \pm 0.00$ | $0.15 \pm 0.00$ |
| 7.4              | $0.75 \pm 0.01$ | $0.67 \pm 0.01$ | $0.41 \pm 0.01$ | $0.42 \pm 0.01$ | $0.35 \pm 0.01$ | $0.25 \pm 0.00$ |
| 7.7              | $0.71 \pm 0.00$ | $0.68 \pm 0.01$ | $0.39 \pm 0.00$ | $0.39 \pm 0.01$ | $0.36 \pm 0.00$ | $0.23 \pm 0.00$ |
| 8.0              | $0.72 \pm 0.01$ | $0.67 \pm 0.01$ | $0.50 \pm 0.01$ | $0.38 \pm 0.01$ | $0.41 \pm 0.00$ | $0.20 \pm 0.00$ |

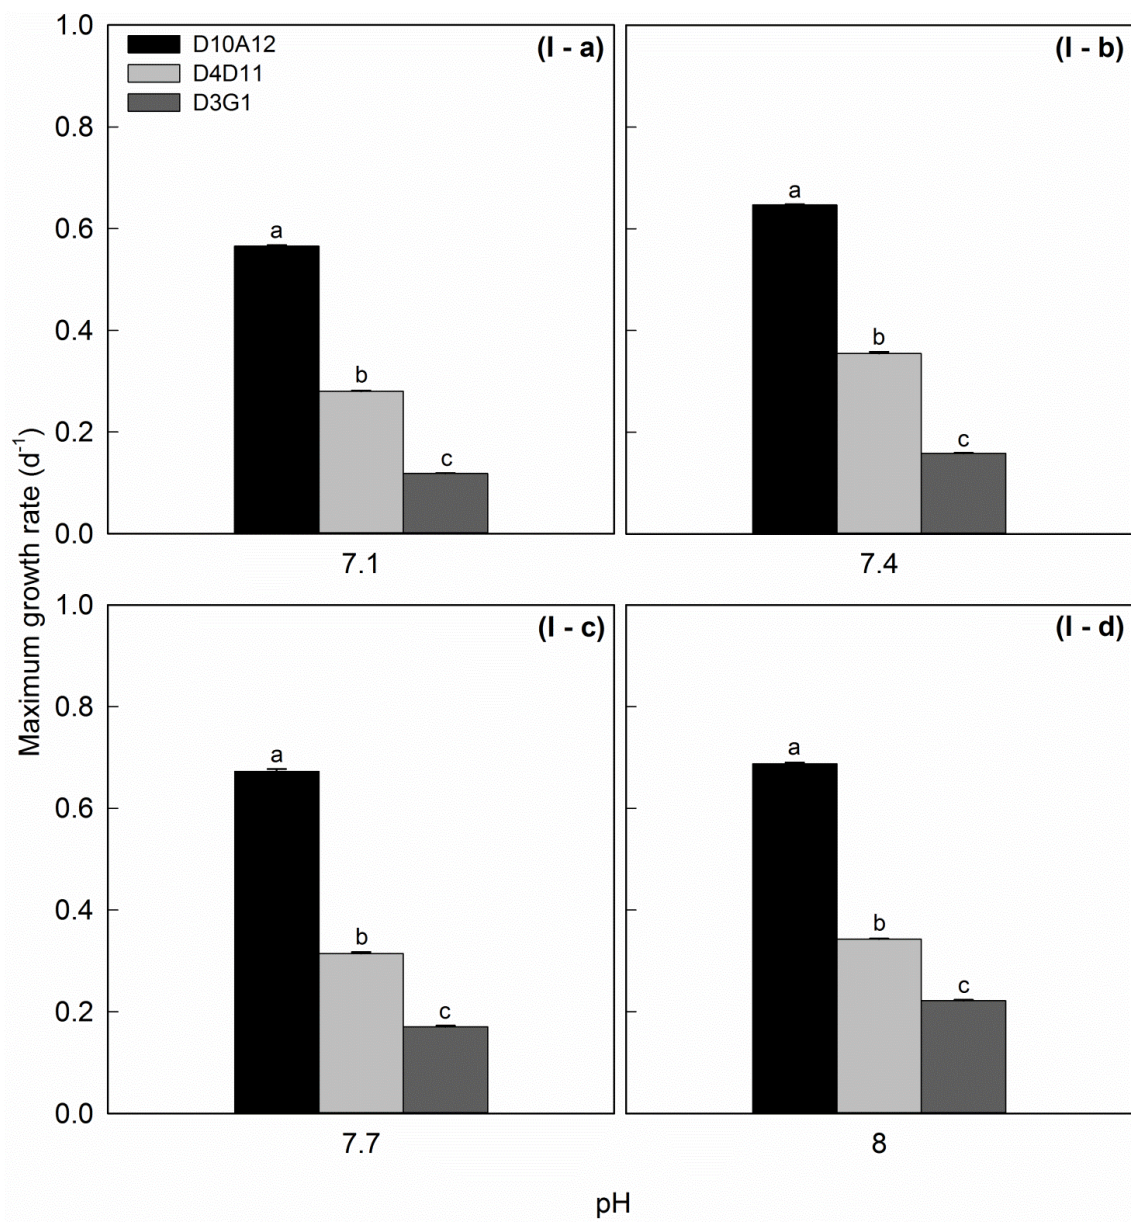

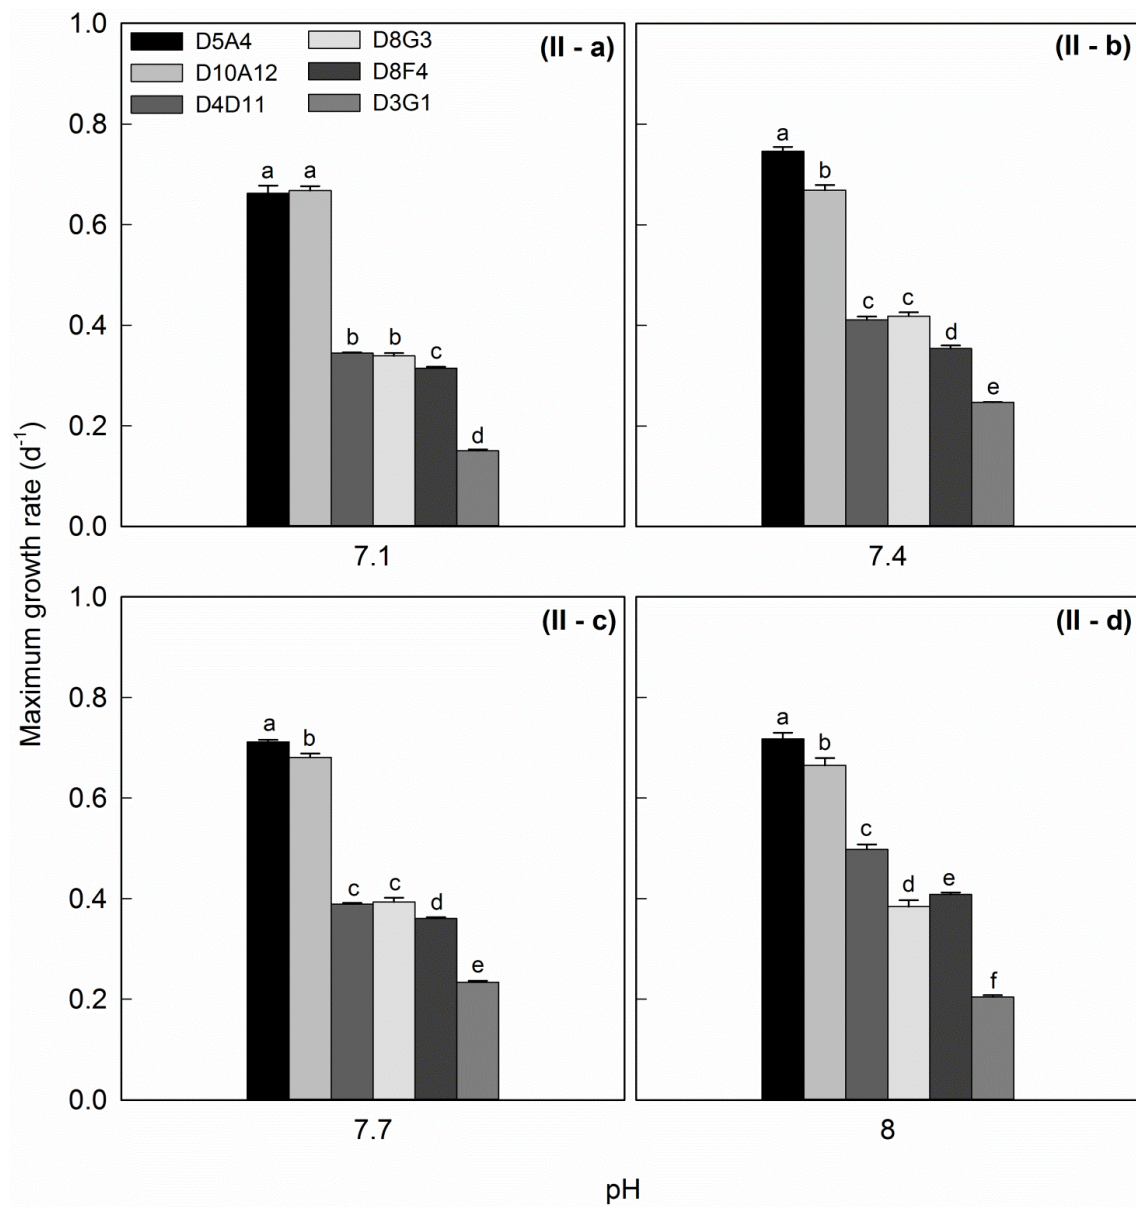



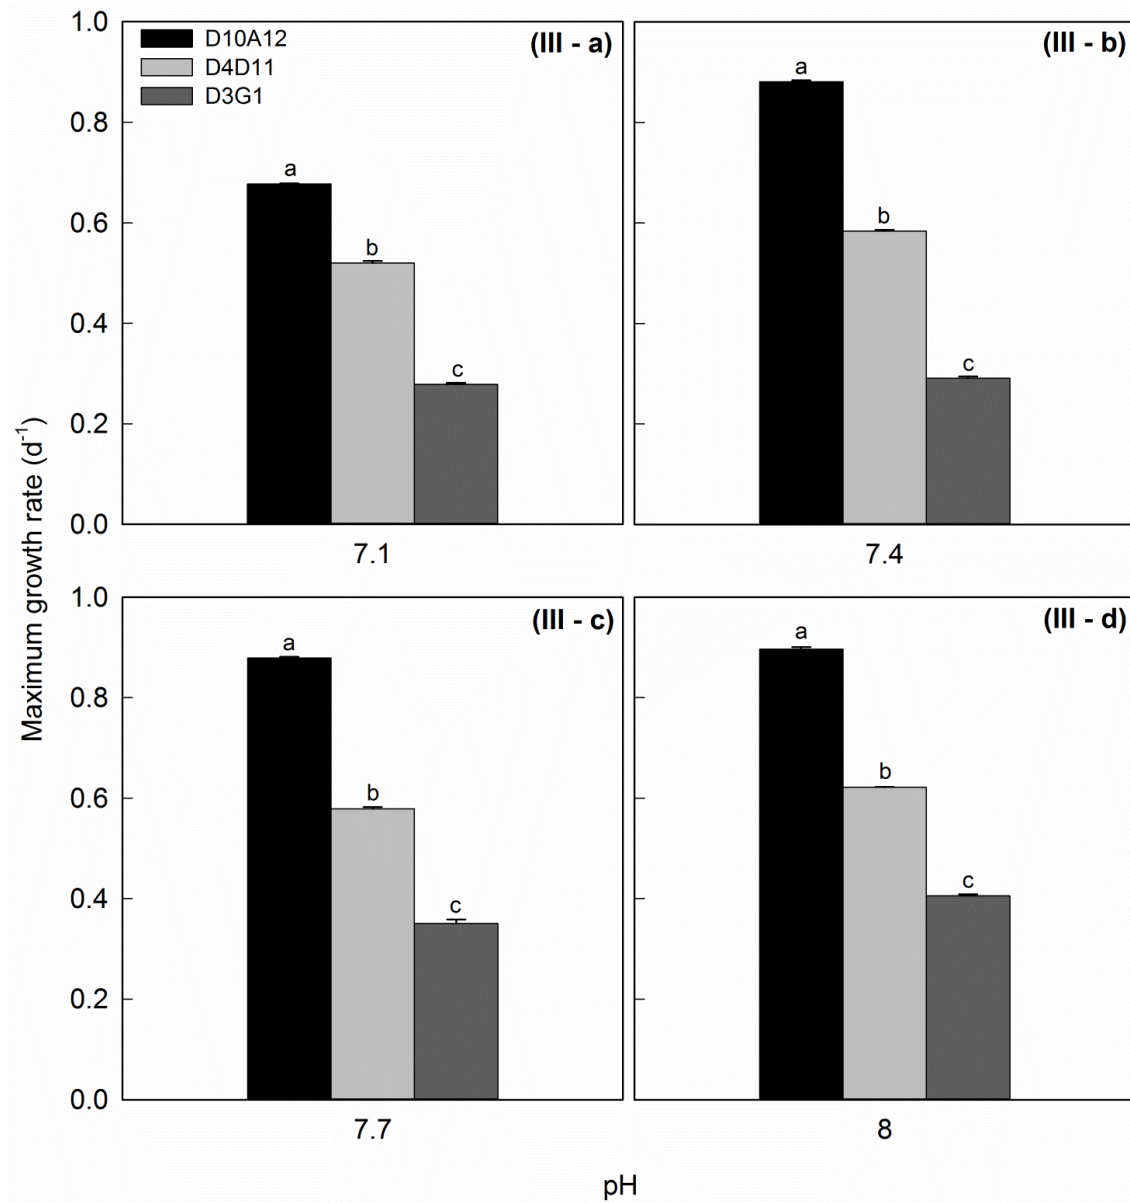

Figure S3. The mean maximum growth rates ( $d^{-1}$ ) for strains D5A4, D10A12, D4D11, D8G3, D8F4 and D3G1 at a temperature of (I) 1 °C, (II) 5 °C and (III) 8 °C, and pH treatments (a) 7.1, (b) 7.4, (c) 7.7, and (d) 8.0. Error bars represent  $\pm$  SD. Different letters above the bars represent significant differences in growth rates within the specific treatment (three-way ANOVA,  $P \leq 0.05$ ).



Table S2. The mean maximum growth rates  $\pm$  SD ( $\text{d}^{-1}$ ) of D10A12, D4D11 and D3G1 strains cultivated at 1 °C, and all four pH treatments.

| pH treatments | D10A12          | D4D11           | D3G1            |
|---------------|-----------------|-----------------|-----------------|
| 7.1           | $0.57 \pm 0.00$ | $0.28 \pm 0.00$ | $0.12 \pm 0.00$ |
| 7.4           | $0.65 \pm 0.00$ | $0.35 \pm 0.00$ | $0.16 \pm 0.00$ |
| 7.7           | $0.67 \pm 0.00$ | $0.31 \pm 0.00$ | $0.17 \pm 0.00$ |
| 8.0           | $0.69 \pm 0.00$ | $0.34 \pm 0.00$ | $0.22 \pm 0.00$ |

Table S3. The mean maximum growth rates  $\pm$  SD ( $\text{d}^{-1}$ ) of D10A12, D4D11 and D3G1 strains cultivated at 8 °C, and all four pH treatments.

| pH treatments | D10A12          | D4D11           | D3G1            |
|---------------|-----------------|-----------------|-----------------|
| 7.1           | $0.68 \pm 0.00$ | $0.52 \pm 0.00$ | $0.28 \pm 0.00$ |
| 7.4           | $0.88 \pm 0.00$ | $0.58 \pm 0.00$ | $0.29 \pm 0.00$ |
| 7.7           | $0.88 \pm 0.00$ | $0.58 \pm 0.00$ | $0.35 \pm 0.01$ |
| 8.0           | $0.90 \pm 0.00$ | $0.62 \pm 0.00$ | $0.41 \pm 0.00$ |

Table S4. The concentrations of  $\text{DIC} \pm \text{SD}$  ( $\text{mmol L}^{-1}$ ),  $\text{HCO}_3^- \pm \text{SD}$  ( $\text{mmol L}^{-1}$ ),  $\text{CO}_3^{2-} \pm \text{SD}$  ( $\mu\text{mol L}^{-1}$ ) and  $\text{CO}_2^* \pm \text{SD}$  ( $\mu\text{mol L}^{-1}$ ) in all four pH treatments, measured<sup>a</sup> or calculated<sup>b</sup> in the end of the experiments.  $\text{CO}_2^*$  is the concentration of  $\text{CO}_2(\text{aq})$  and  $\text{H}_2\text{CO}_3$ .

|                                                      | 7.1             | 7.4             | 7.7             | 8.0             |
|------------------------------------------------------|-----------------|-----------------|-----------------|-----------------|
| $\text{DIC} (\text{mmol L}^{-1})^{\text{a}}$         | $2.65 \pm 0.00$ | $2.55 \pm 0.01$ | $2.36 \pm 0.01$ | $2.15 \pm 0.01$ |
| $\text{HCO}_3^- (\text{mmol L}^{-1})^{\text{b}}$     | $2.43 \pm 0.00$ | $2.41 \pm 0.00$ | $2.25 \pm 0.00$ | $2.03 \pm 0.00$ |
| $\text{CO}_3^{2-} (\mu\text{mol L}^{-1})^{\text{b}}$ | $16.9 \pm 0.4$  | $32.2 \pm 1.2$  | $57.2 \pm 2.7$  | $96.7 \pm 4.9$  |
| $\text{CO}_2^* (\mu\text{mol L}^{-1})^{\text{b}}$    | $199.8 \pm 4.3$ | $103.3 \pm 3.5$ | $50.6 \pm 2.5$  | $24.3 \pm 1.4$  |
